# Supplementary material
Source: HighWire-hosted journal article supplement (https://jitc.bmj.com/content/11/4/e006267)

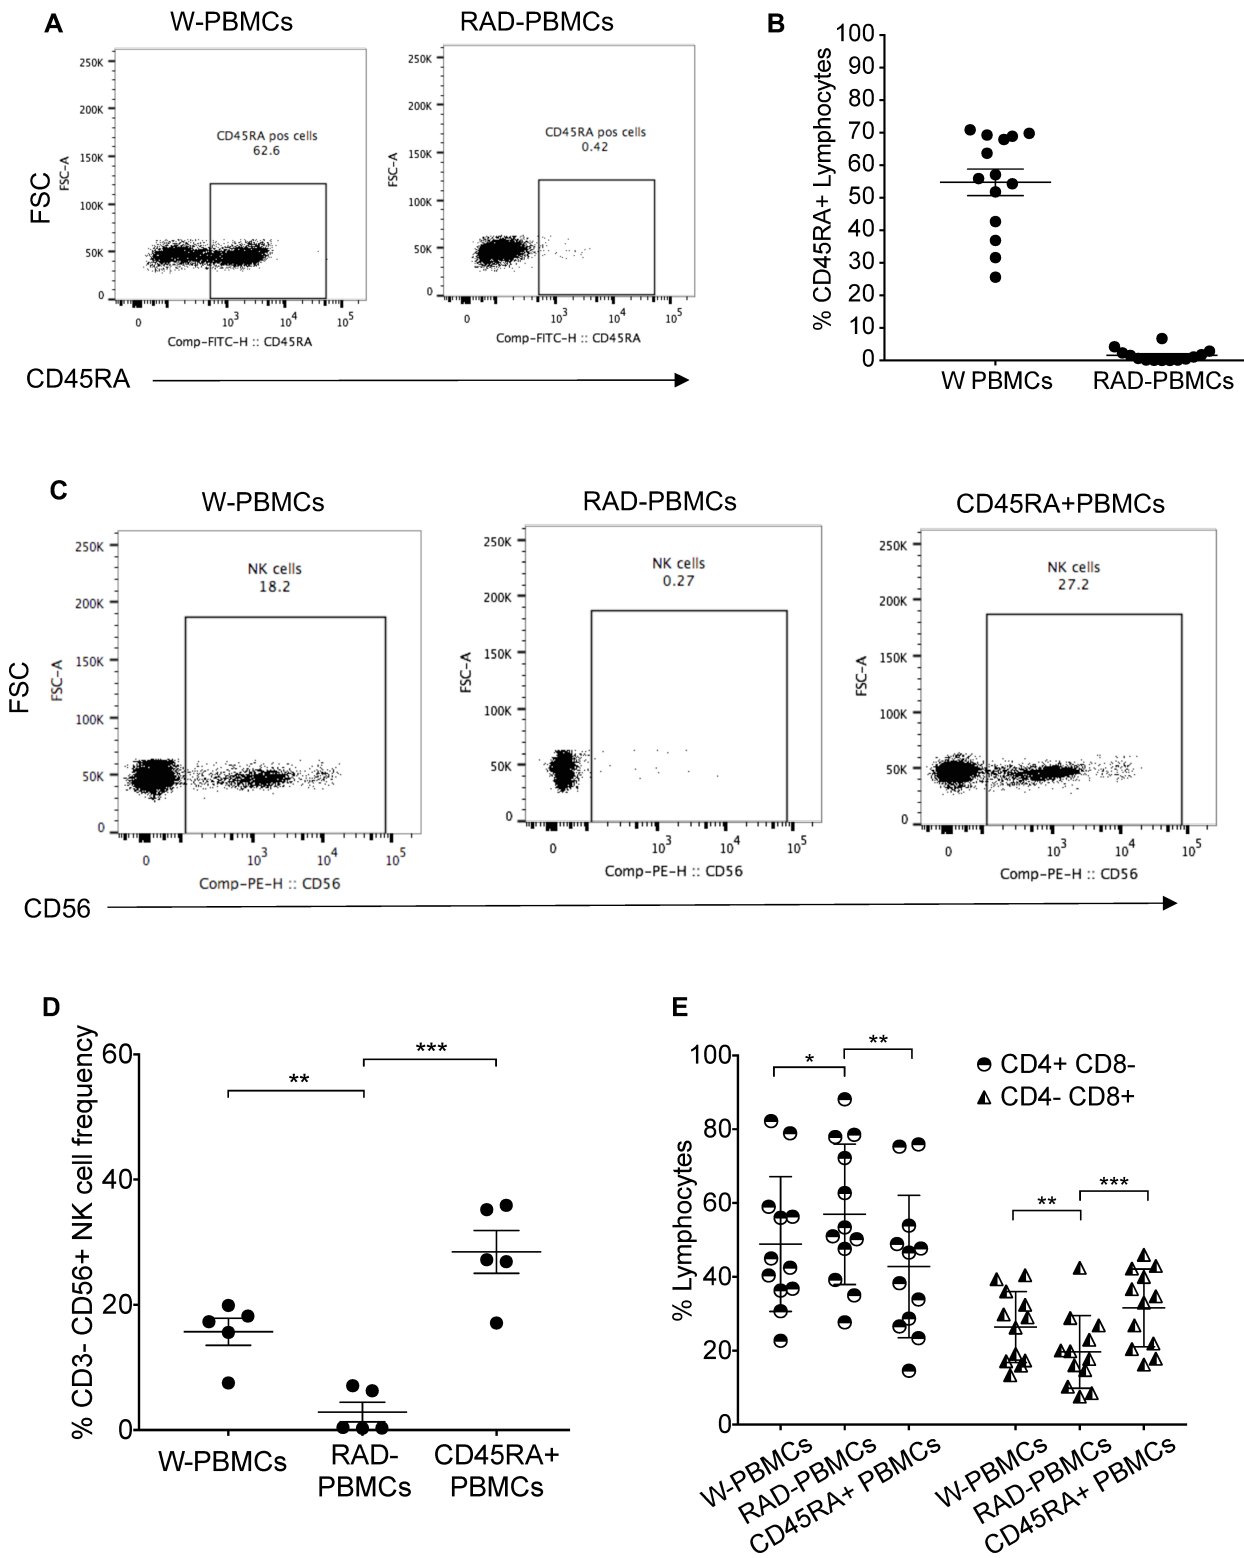

Supplement: inline-supplementary-material-2 [file inline-supplementary-material-2.pdf]

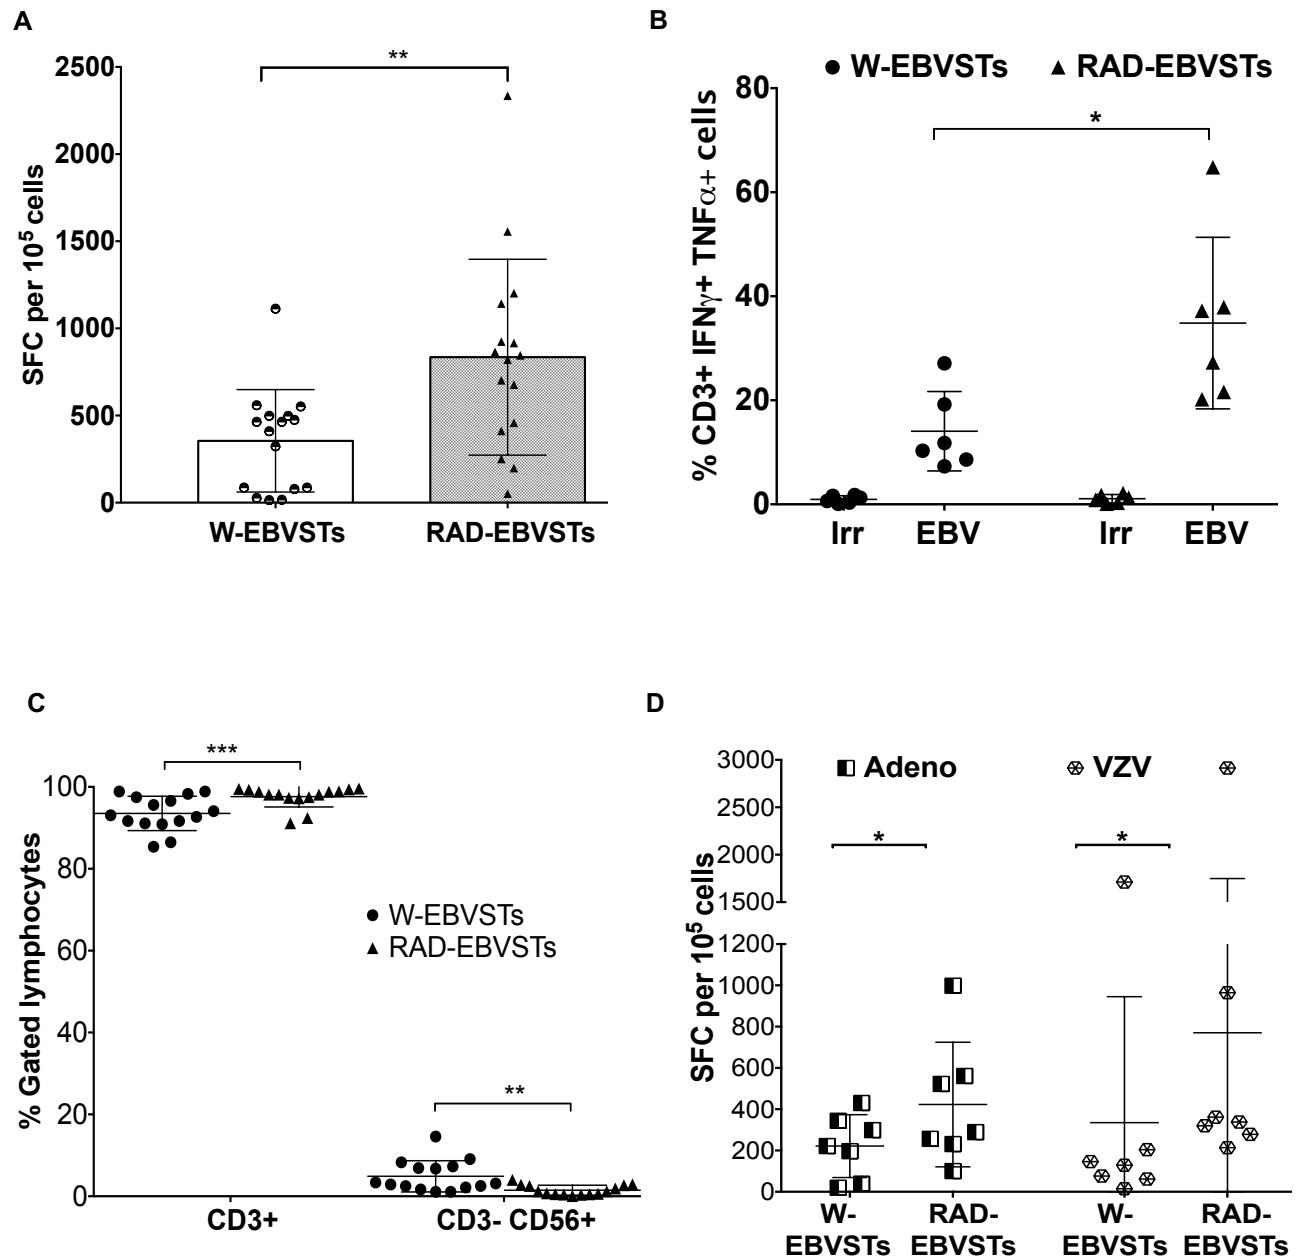

Supplement: inline-supplementary-material-3 [file inline-supplementary-material-3.pdf]

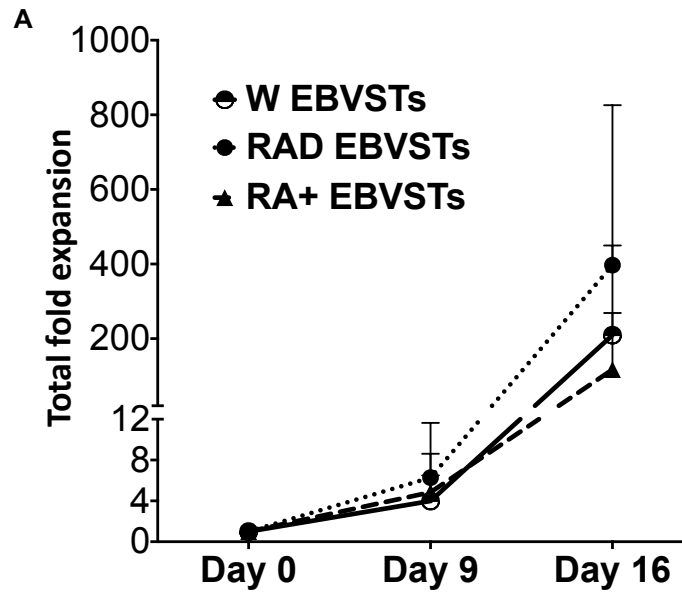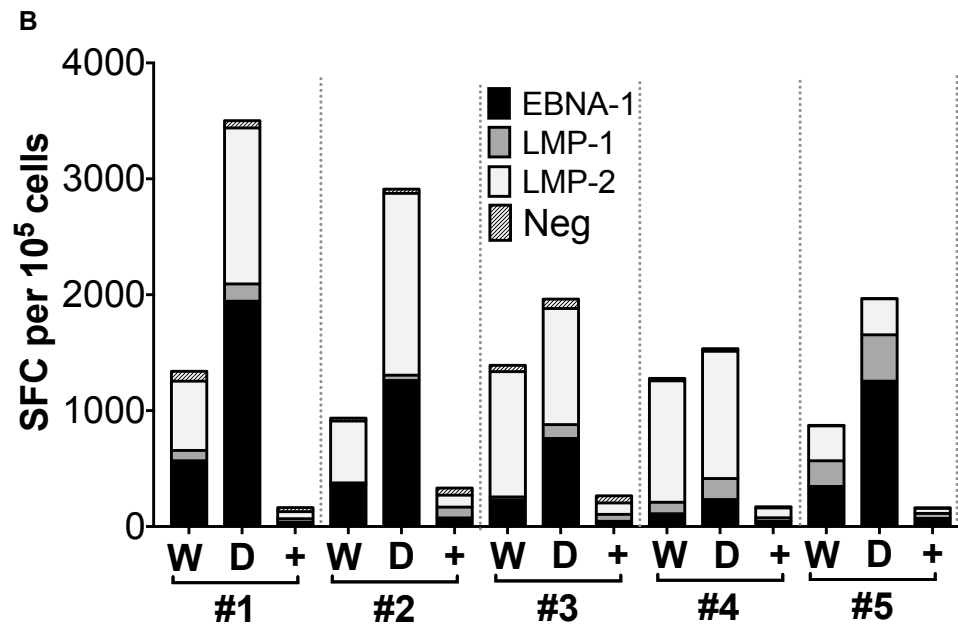

Supplement: inline-supplementary-material-4 [file inline-supplementary-material-4.pdf]

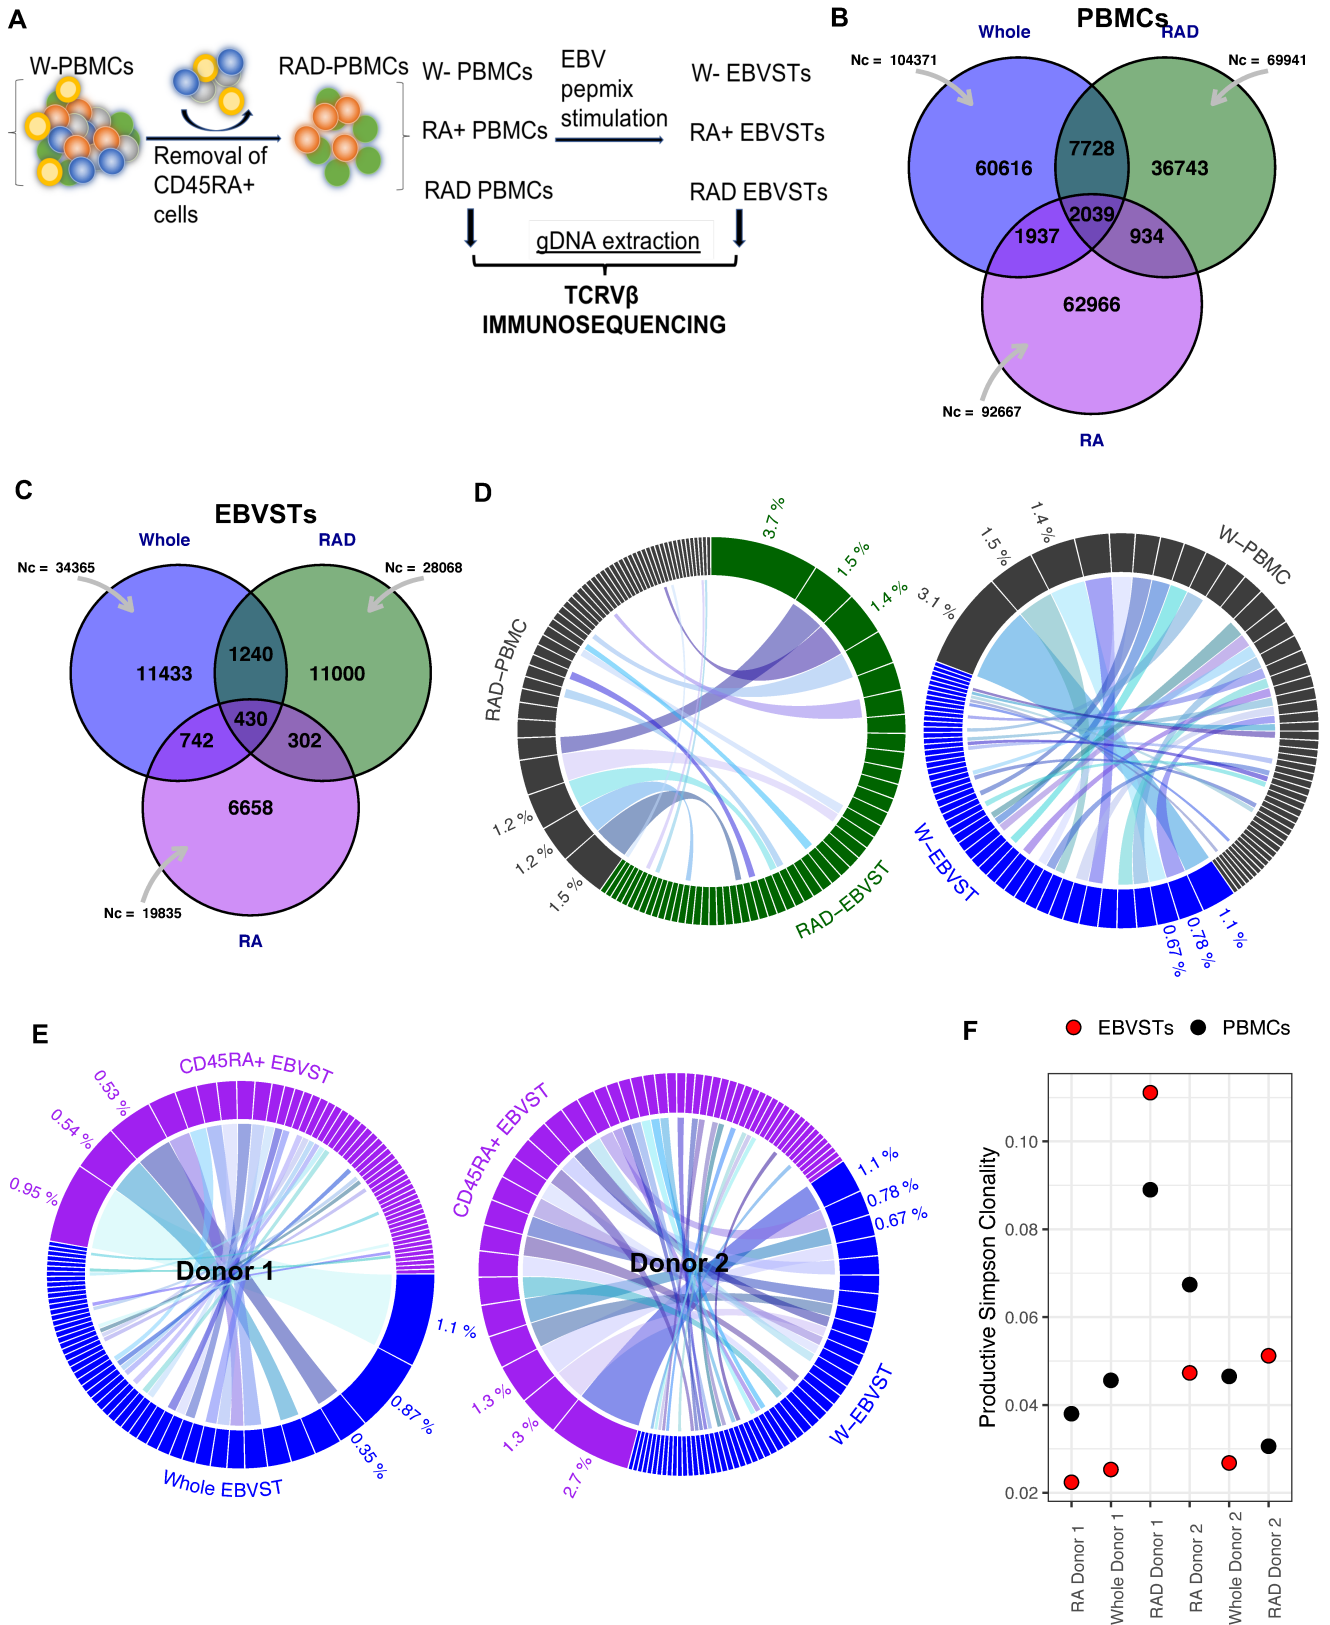

Supplement: inline-supplementary-material-5 [file inline-supplementary-material-5.pdf]

A

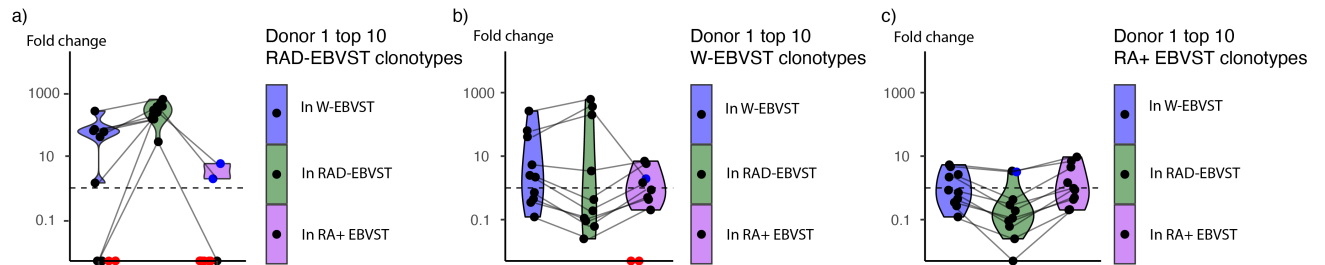

B

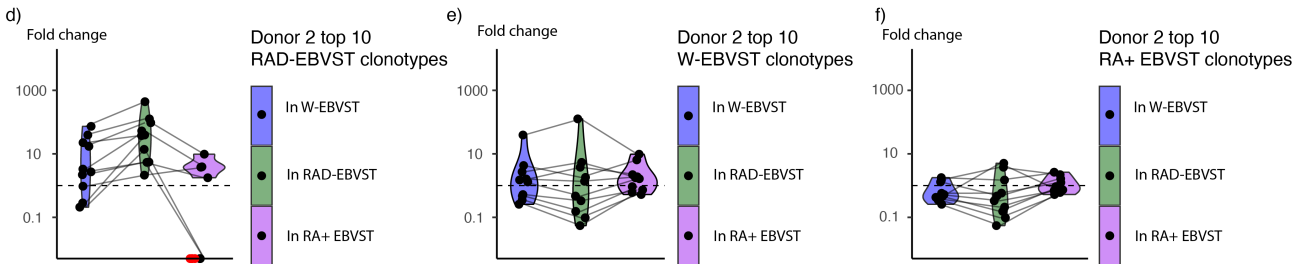

Supplement: inline-supplementary-material-6 [file inline-supplementary-material-6.pdf]

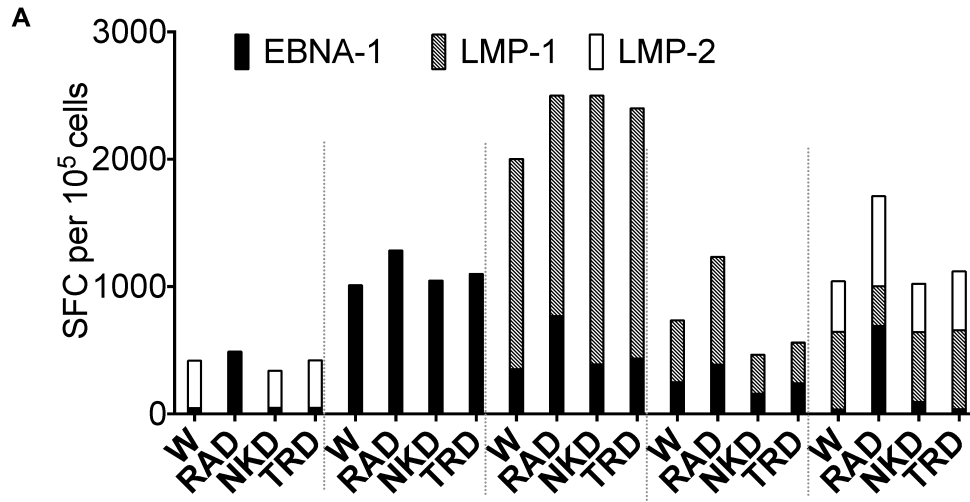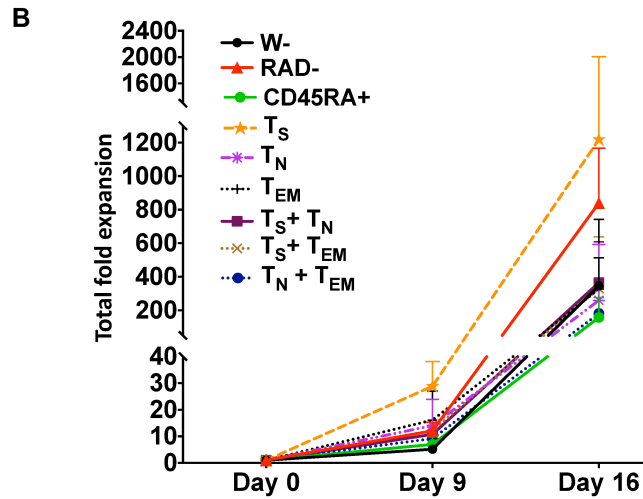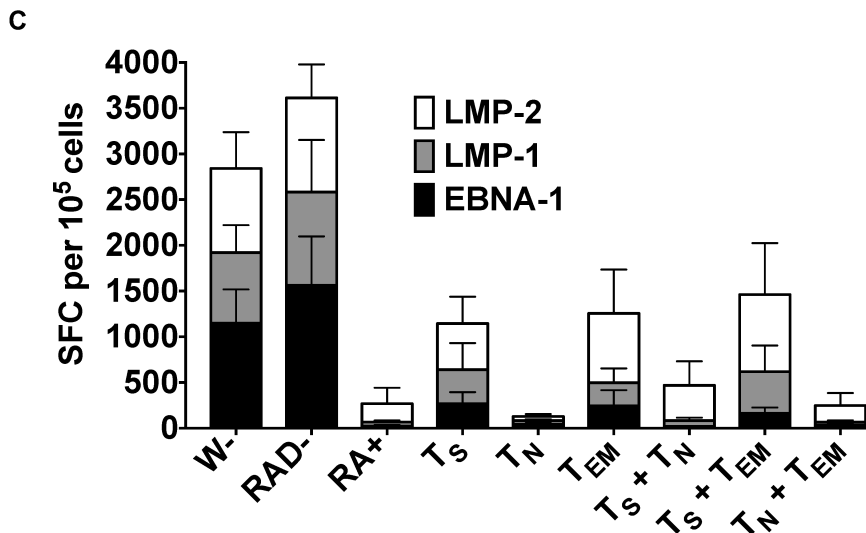

Supplement: inline-supplementary-material-7 [file inline-supplementary-material-7.pdf]

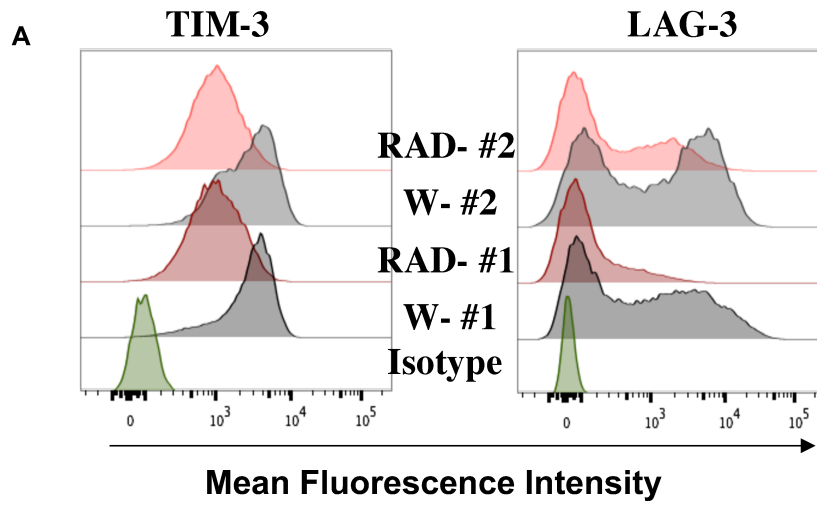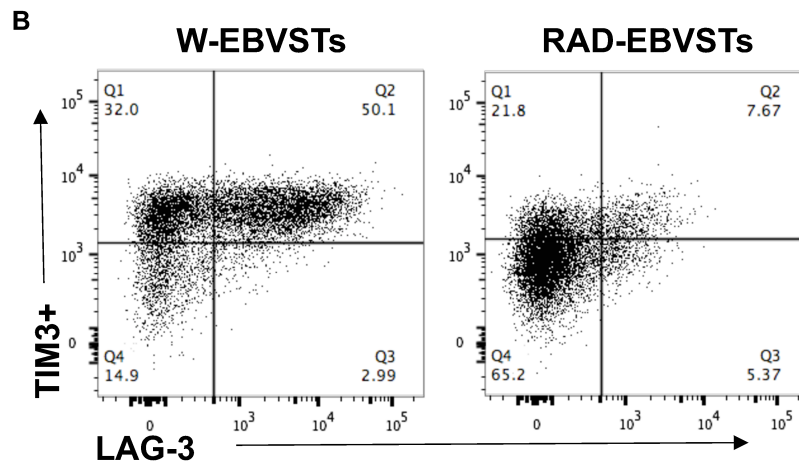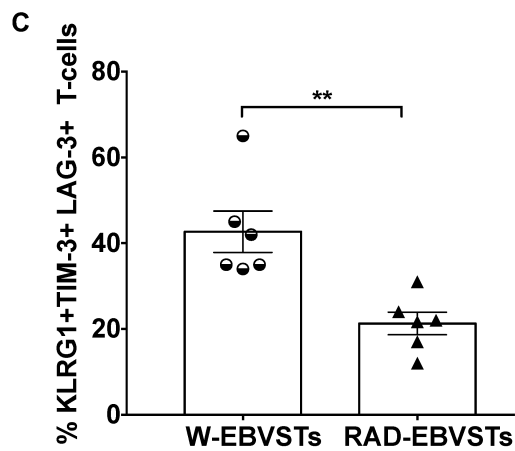

Supplement: inline-supplementary-material-8 [file inline-supplementary-material-8.pdf]
